# Supplementary material for: The evolution of Ge nanostructures growth on silicon substrate by reduction of GeO2
Source: Royal Society of Chemistry journal article supplement (doi:10.1039/c2ce06485e), 2012-01-01
Supplement: c2ce06485e.pdf [file c2ce06485e.pdf]

## Electronic Supplementary Information

### The evolution of Ge nanostructures growth on silicon substrate by reduction of $\text{GeO}_2$

Hung-Chi Wu, Hsin-Tien Chiu, Chi-Young Lee

5

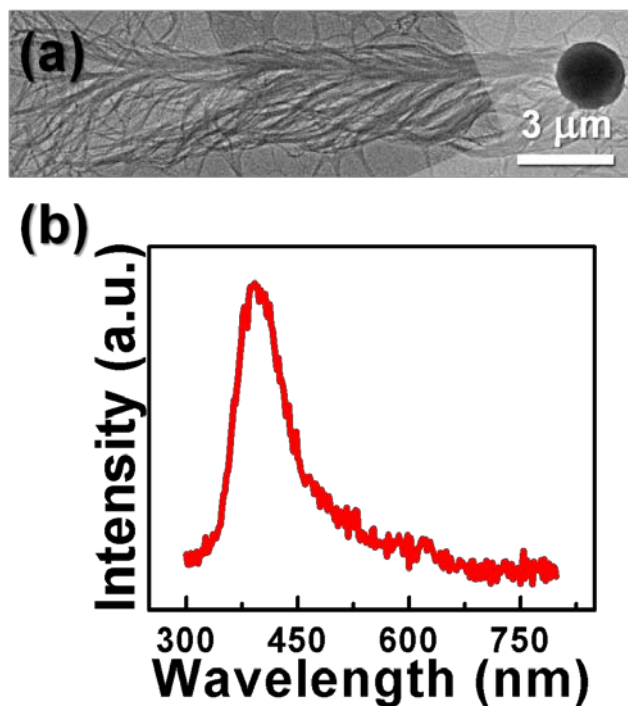

**Fig. S1** (a) TEM image of a Ge-particle/ $\text{SiO}_2$ NW-tails assembled structure in Fig. 3b and (b) its corresponding room-temperature CL spectrum.

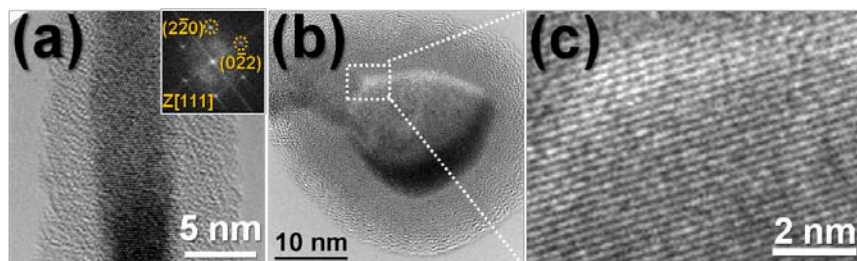

**Fig. S2** (a) TEM image of a Ge nanowire in Fig. 6a and inset is its fast Fourier transform; (b) TEM image of the droplet-like end of a Ge nanowire in Fig. 6b, and (c) HR-TEM image from the indicated square.

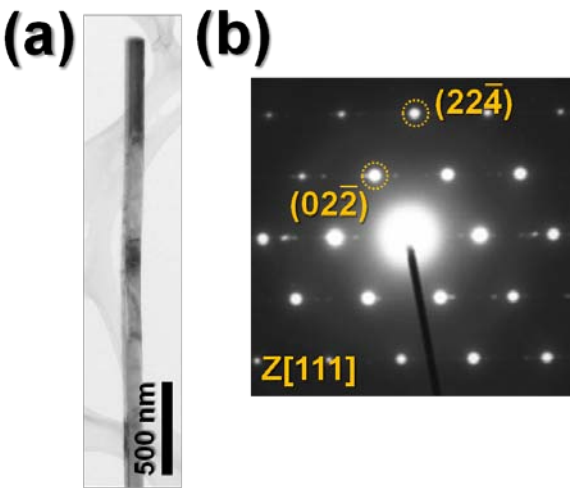

**Fig. S3** (a) TEM image of a Ge nanowire in Fig. 7c; (b) its corresponding SAED pattern from (a).

5

10

15

20

25

30

35

40

45

50

55

60

65

70

75

80
